# Supplementary material for: Nitrous oxide emission by the non-denitrifying, nitrate ammonifier Bacillus licheniformis
Source: PubMed Central journal article supplement (PMC4719734; doi:10.1186/s12864-016-2382-2), 2016-01-19
Supplement: 12864_2016_2382_MOESM1_ESM.pdf [file 12864_2016_2382_MOESM1_ESM.pdf]

**Figure S1.** Phylogenetic tree of full-length NarG. Sequences were taken from genomes included in the manuscript as well as all from publically available *B. licheniformis* genomes (dd June 2014) and genomes from other *Bacillus* species, protein ID or locus tag is given between brackets. The evolutionary history was inferred using the Neighbor-Joining method [1]. The optimal tree with the sum of branch length = 1,68972248 is shown. The percentage of replicate trees in which the associated taxa clustered together in the bootstrap test (500 replicates) are shown next to the branches [2]. The evolutionary distances were computed using the Poisson correction method [3] and are in the units of the number of amino acid substitutions per site. All positions containing gaps and missing data were eliminated. There were a total of 1094 positions in the final dataset. Evolutionary analyses were conducted in MEGA6 [4].

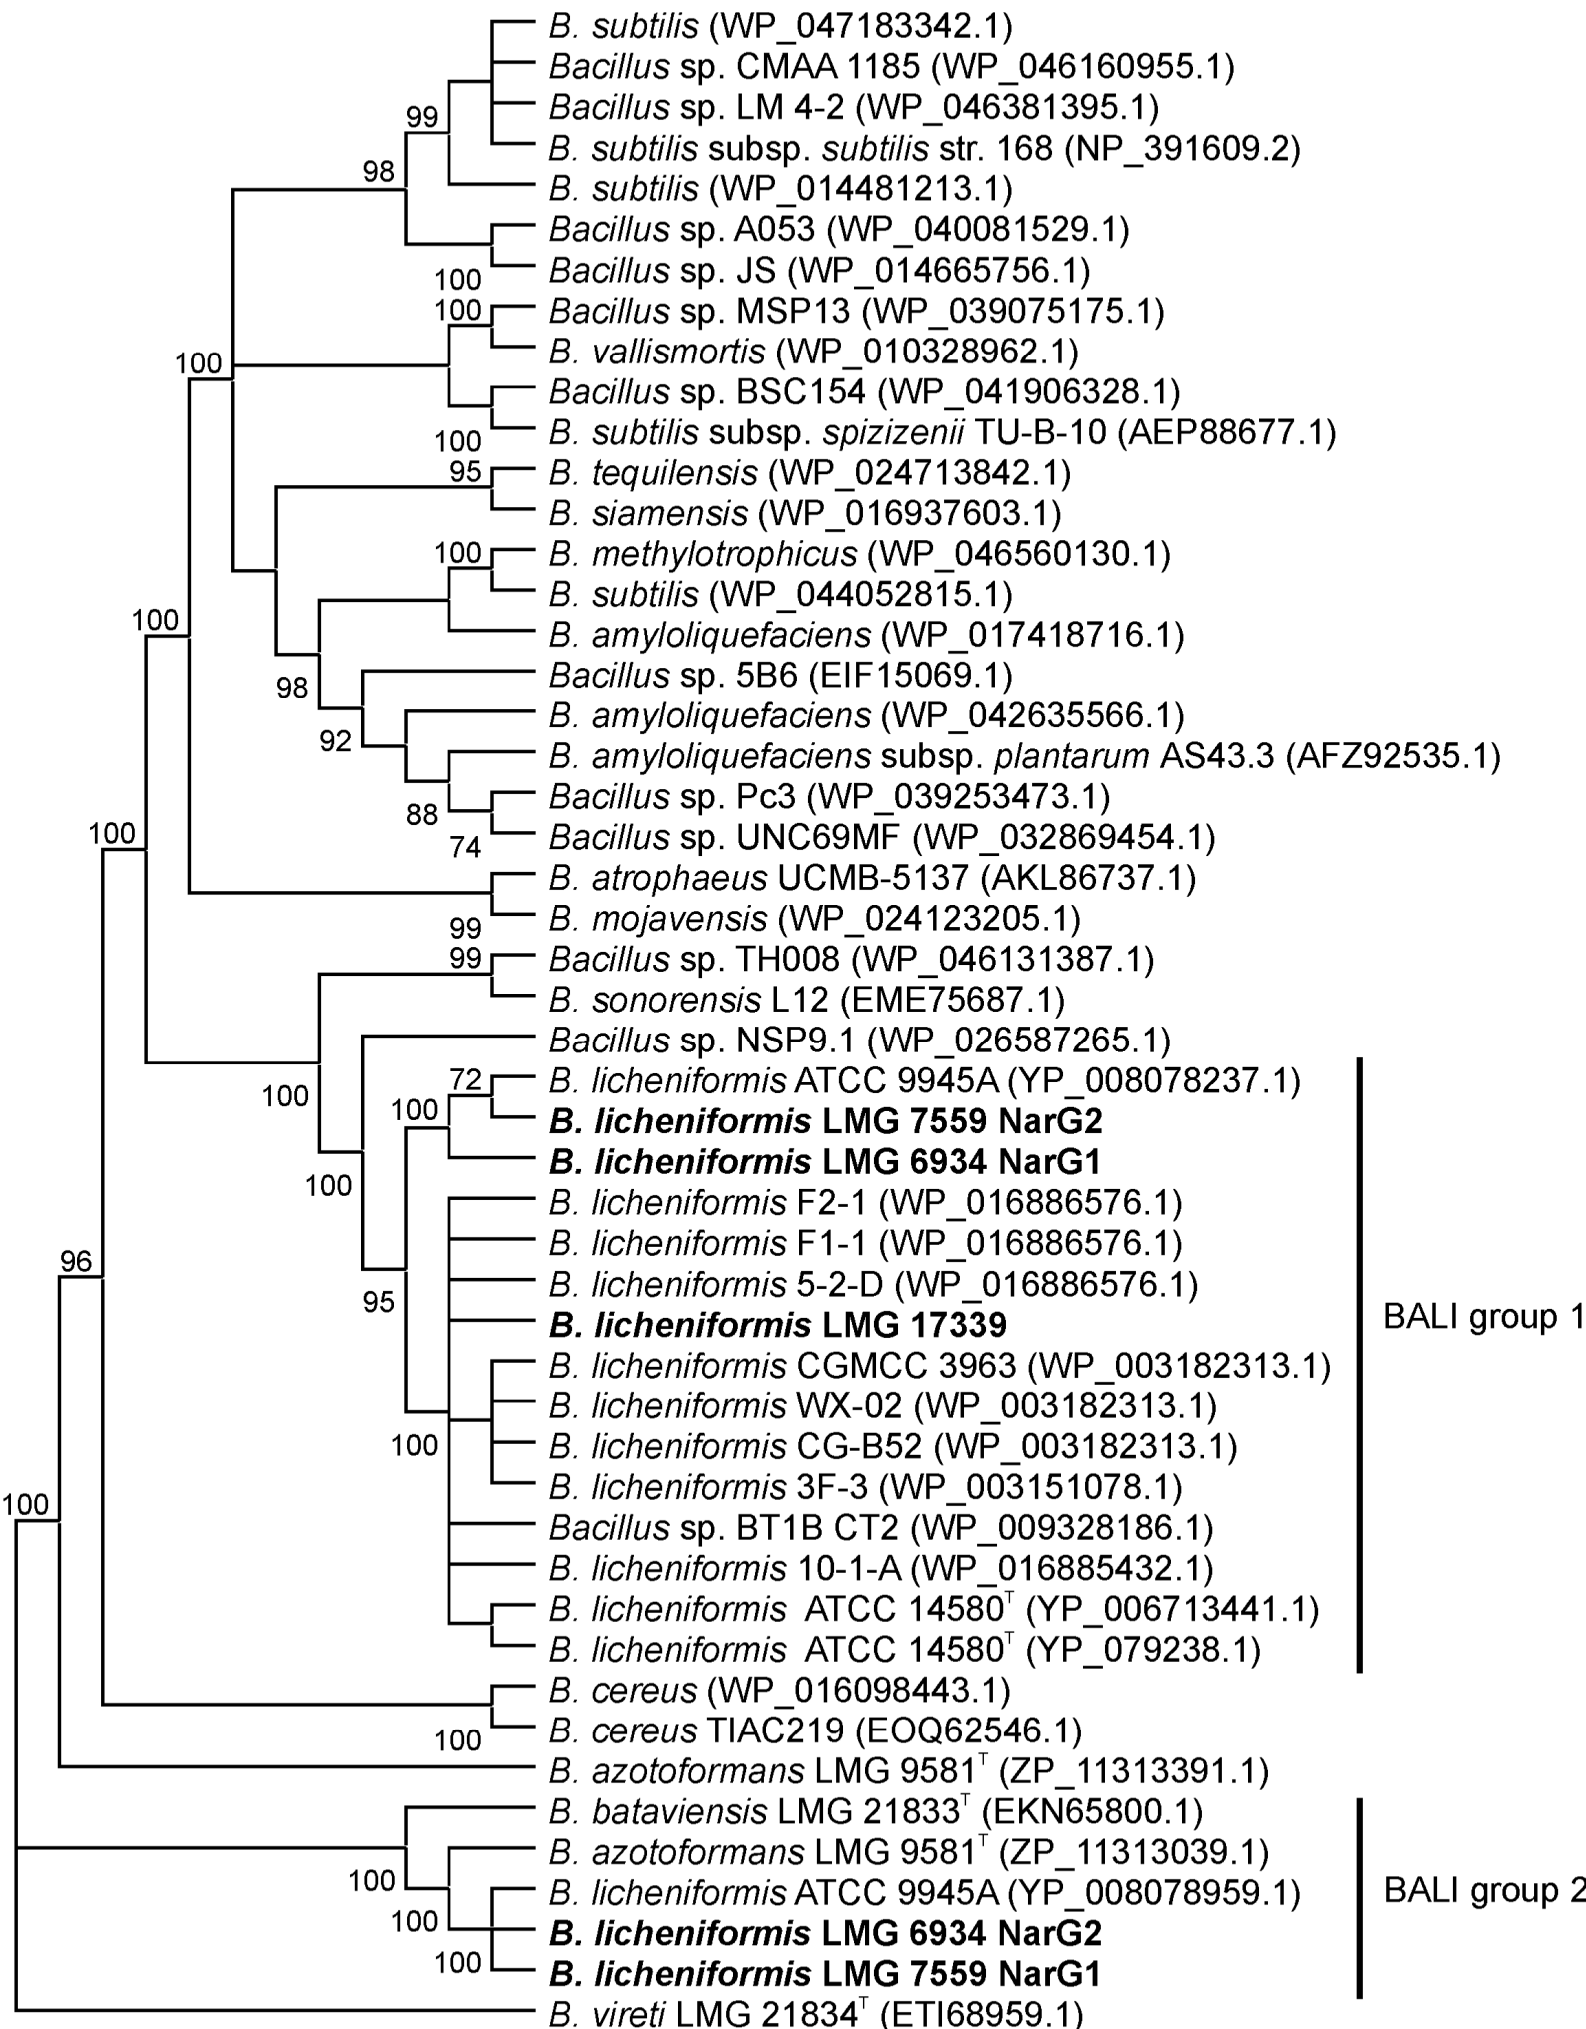

**Figure S2.** Phylogenetic tree of full-length NarK. Sequences were taken from several *Bacillus* species, as well as reference genomes, locus tag is given between brackets. The evolutionary history was inferred using the Neighbor-Joining method [1]. The optimal tree with the sum of branch length = 6,03046656 is shown. The percentage of replicate trees in which the associated taxa clustered together in the bootstrap test (500 replicates) are shown next to the branches [2]. The tree is drawn to scale, with branch lengths in the same units as those of the evolutionary distances used to infer the phylogenetic tree. The evolutionary distances were computed using the Poisson correction method [3] and are in the units of the number of amino acid substitutions per site. All positions containing gaps and missing data were eliminated. There were a total of 358 positions in the final dataset. Evolutionary analyses were conducted in MEGA6 [4].

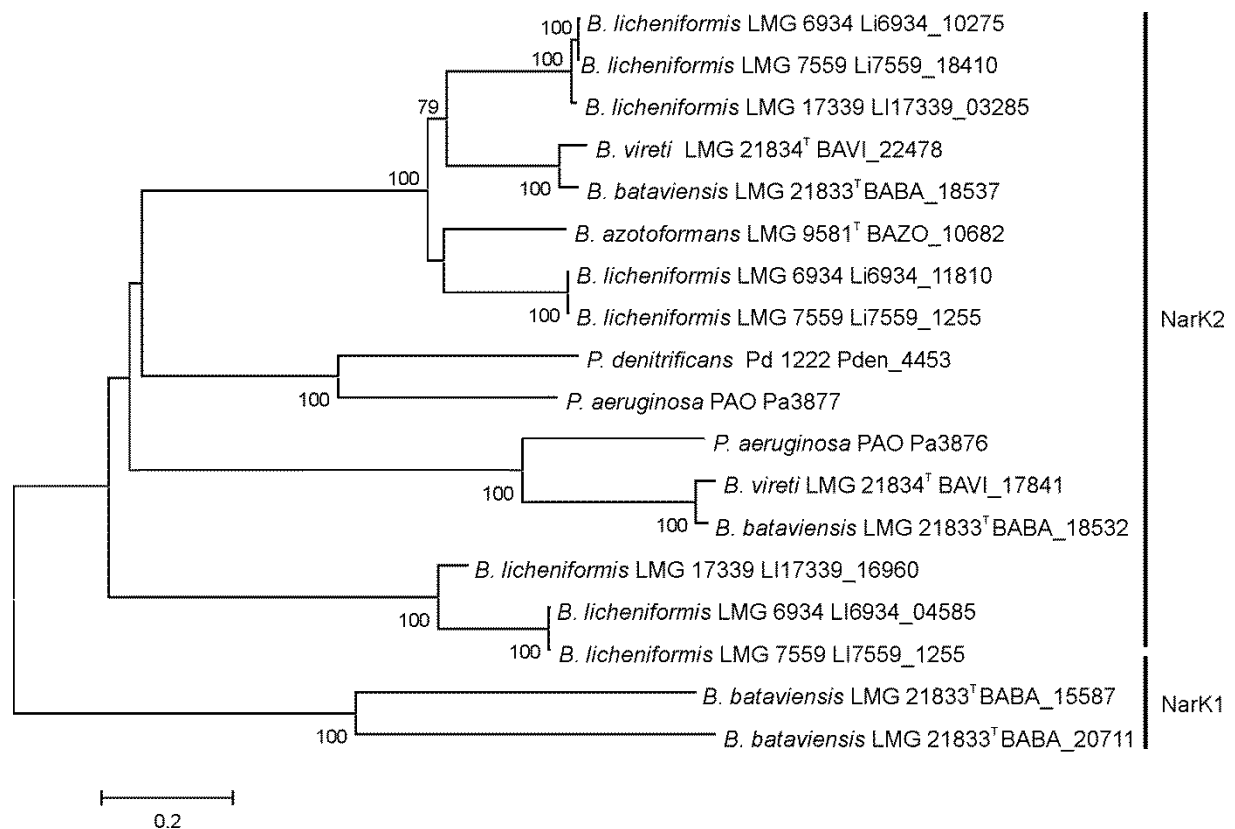

**Figure S3.** Whole genome clustering based on a similarity matrix using the peptidome content, in which amino acid sequences of a genome are converted to tryptic peptides, i.e. the tryptic peptidome. All publically available *B. licheniformis* genomes (dd June 2014) were included and are designated by their strain number: 9945A (accession number NC\_021362) [5], ATCC 14580 (accession number NC\_006270) [6], DSM 13 (=ATCC 14580; accession number NC\_006322) [7], 5-2-D (accession number NZ\_AJLW01000000) [8], F1-1 (accession number NZ\_AZSL01000000) [9], 3F-3 (accession number NZ\_JFYM01000000) [8], F2-1 (accession number NZ\_AZSM01000000) [9], WX-02 (accession number NZ\_JH636050) [10], 10-1-A (accession number NZ\_AJLV01000001) [11], CGMCC 3963 (accession number NZ\_AMWQ01000000) [12], CG-B52 (accession number NZ\_AVEZ01000000). Analyses were performed using the Peptidome tool (<http://unipept.ugent.be/>) [13].

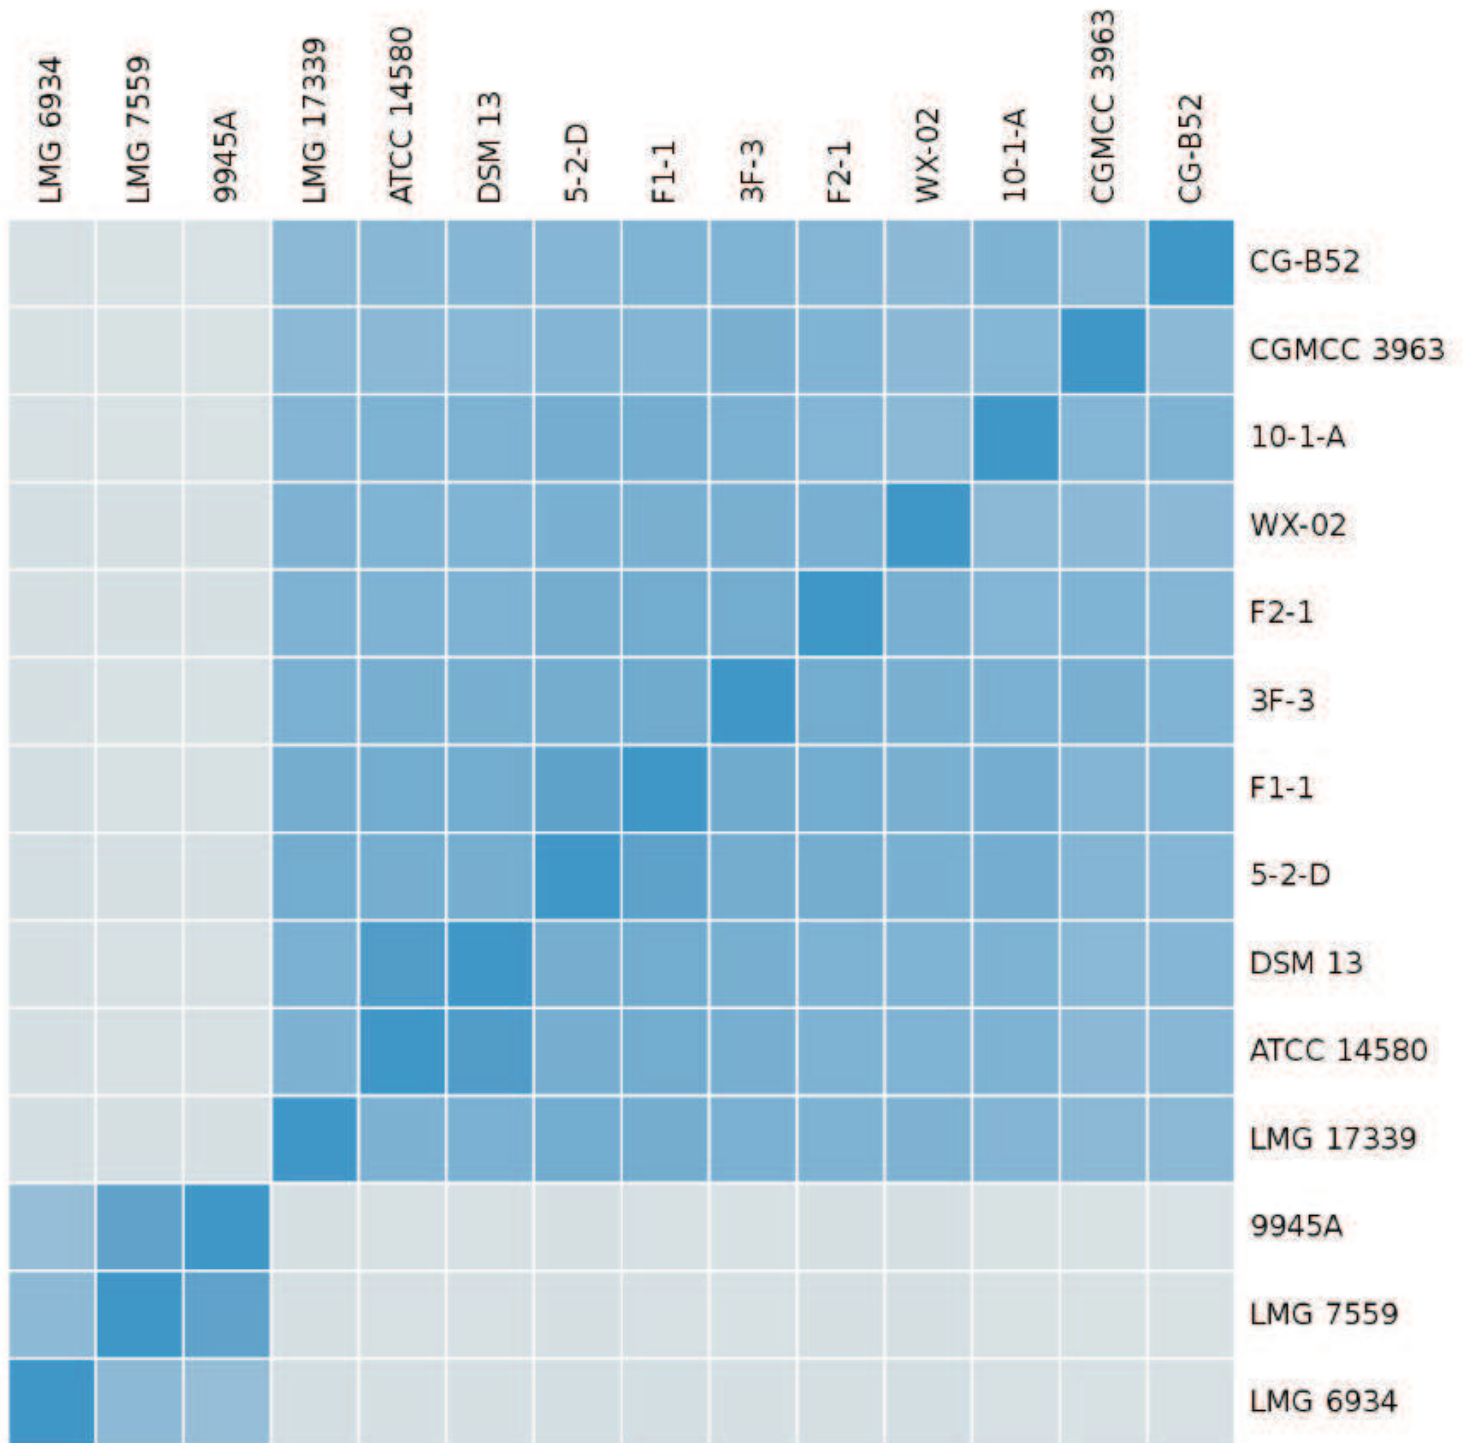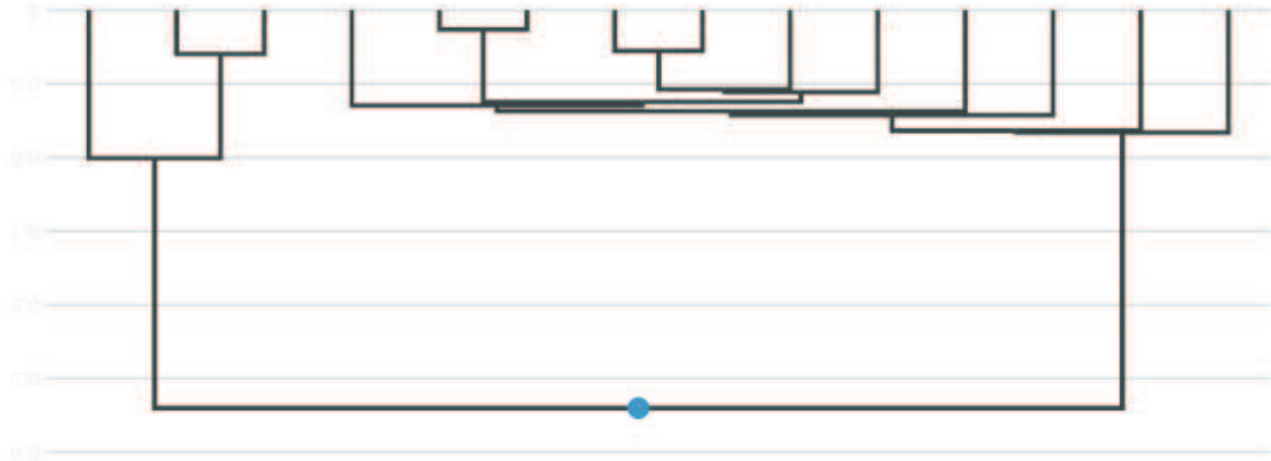

## REFERENCES

1. Saitou N, Nei M: **The neighbor-joining method: a new method for reconstructing phylogenetic trees.** *Mol Biol Evol* 1987, **4**(4):406-425.
2. Felsenstein J: **Confidence Limits on Phylogenies: An Approach Using the Bootstrap.** *Evolution* 1985, **39**(4):783-791.
3. E. Z, L. P: **Evolutionary divergence and convergence in proteins.** In: *Evolving Genes and Proteins.* Edited by Bryson V, Vogel HJ. New York: Academic Press; 1965: 97-166.
4. Tamura K, Stecher G, Peterson D, Filipinski A, Kumar S: **MEGA6: Molecular Evolutionary Genetics Analysis version 6.0.** *Mol Biol Evol* 2013, **30**(12):2725-2729.
5. Rachinger M, Volland S, Meinhardt F, Daniel R, Liesegang H: **First Insights into the Completely Annotated Genome Sequence of *Bacillus licheniformis* Strain 9945A.** *Genome announcements* 2013, **1**(4).
6. Rey MW, Ramaiya P, Nelson BA, Brody-Karpin SD, Zaretsky EJ, Tang M, Leon ALd, Xiang H, Gusti V, Clausen IG *et al*: **Complete genome sequence of the industrial bacterium *Bacillus licheniformis* and comparisons with closely related *Bacillus* species.** *Genome Biology* 2004, **5**:R77.
7. Veith B, Herzberg C, Steckel S, Feesche J, Maurer KH, Ehrenreich P, Bäumer S, Henne A, Liesegang H, Merkl R *et al*: **The Complete Genome Sequence of *Bacillus licheniformis* DSM13, an Organism with Great Industrial Potential.** *J Mol Microbiol Biotechnol* 2004, **7**:204-211.
8. Li L, Wang Y, Wang K, Li K, Ma C, Xu P: **Genome Sequence of Thermophilic *Bacillus licheniformis* Strain 3F-3, an Efficient Pentose-Utilizing Producer of 2,3-Butanediol.** *Genome announcements* 2014, **2**(3).
9. Dhakal R, Seale RB, Deeth HC, Craven H, Turner MS: **Draft Genome Comparison of Representatives of the Three Dominant Genotype Groups of Dairy *Bacillus licheniformis* Strains.** *Appl Environ Microbiol* 2014, **80**(11):3453-3462.
10. Yangtse W, Zhou Y, Lei Y, Qiu Y, Wei X, Ji Z, Qi G, Yong Y, Chen L, Chen S: **Genome sequence of *Bacillus licheniformis* WX-02.** *J Bacteriol* 2012, **194**(13):3561-3562.
11. Li L, Su F, Wang Y, Zhang L, Liu C, Li J, Ma C, Xu P: **Genome sequences of two thermophilic *Bacillus licheniformis* strains, efficient producers of platform chemical 2,3-butanediol.** *J Bacteriol* 2012, **194**(15):4133-4134.
12. Wu Q, Peng S, Yu Y, Li Y, Xu Y: **Genome Sequence of *Bacillus licheniformis* CGMCC3963, a Stress-Resistant Strain Isolated in a Chinese Traditional Solid-State Liquor-Making Process.** *Genome announcements* 2013, **1**(1).
13. Mesuere B, Devreese B, Debyser G, Aerts M, Vandamme P, Dawyndt P: **Unipept: tryptic peptide-based biodiversity analysis of metaproteome samples.** *Journal of proteome research* 2012, **11**(12):5773-5780.
